# Supplementary material for: Refined human artificial chromosome vectors for gene therapy and animal transgenesis
Source: PubMed Central journal article supplement — Gene Ther. 2010 Nov 18;18(4):384–93. doi: 10.1038/gt.2010.147 (PMC3125098; doi:10.1038/gt.2010.147), 2010-11-18

# Supplementary Figure S4

a

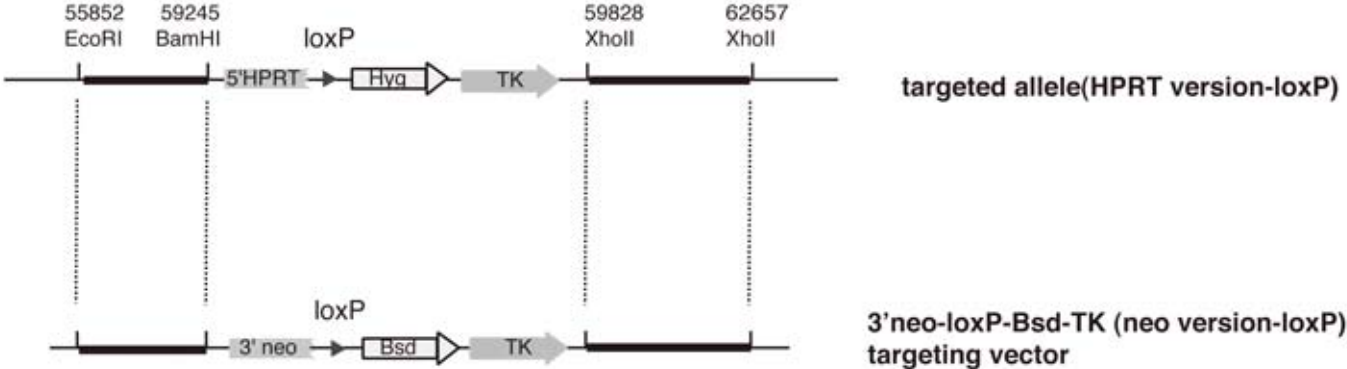

Homologous recombination in DT40 cells  
(Targeting efficiency=31.0% <18/58>)

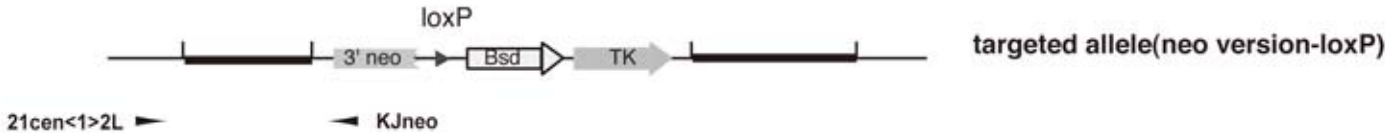

b

Cre-loxP-mediated genomic insertion

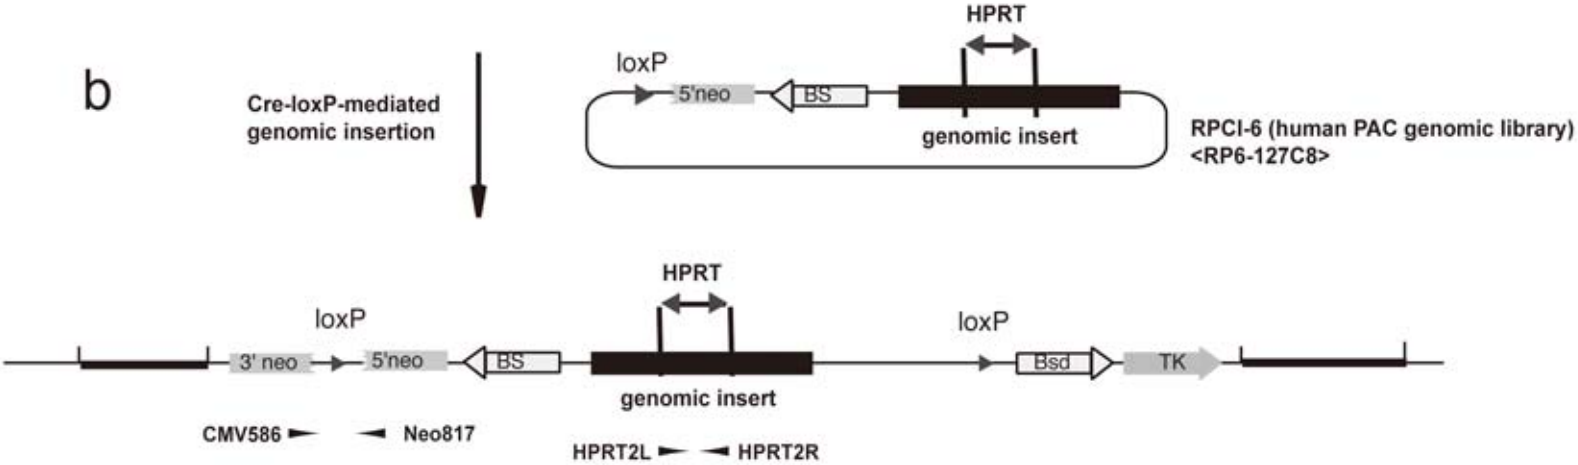

Supplement: gt2010147x4.pdf [file gt2010147x4.pdf]
