# Supplementary material for: Refined human artificial chromosome vectors for gene therapy and animal transgenesis
Source: PubMed Central journal article supplement — Gene Ther. 2010 Nov 18;18(4):384–93. doi: 10.1038/gt.2010.147 (PMC3125098; doi:10.1038/gt.2010.147), 2010-11-18
Supplement: gt2010147x7.pdf [file gt2010147x7.pdf]

Supplementary Table S1 Primers and oligos used in the TAR cloning

| Primers                                                             | Contig/gene |
|---------------------------------------------------------------------|-------------|
| <b><i>Hooks for cloning of p-arm</i></b>                            |             |
| 5' hook (a 546 bp of Puro gene sequence):                           |             |
| puro-F 5'-ATGCGGGCCCTACCGGGTAGGGGAGGCGCT-3'                         |             |
| puro-R 5'-ATGCGGATCCTGGTAAGCTTCAGCTGCTCGA-3'                        |             |
| 3' hook (a 85 bp alphoid DNA sequence):                             |             |
| Sat-F 5'-CATTCTCAGAACTTCTTTGTGATGTGTGCATTCAACTCACAGAGTTGAACCTTCC-3' |             |
| Sat-R 5'-AAGAGTGTTCAAAAGCTCTATGAAAAGGAAGTTCAACTCTGTGAGTTGAAT-3'     |             |
| <b><i>DIAGNOSTIC PRIMERS FOR P-ARM</i></b>                          |             |
| Diagnostic Del-1 5'-GCATCGATGATATCAGATCC-3'                         | (PGK-PA)    |
| Diagnostic Del-4 5'-TGGAACAGAGGCTGCTGATC-3'                         |             |
| A-F2 5'-ACCTTCCTGATGGTATTGTCA-3'                                    | Contig A    |
| A-R2 5'-TGTGCTGATCCATGAGTACTACA-3'                                  |             |
| B-R 5'-TGAGAATAAACAGAGATTCCATTCT-3'                                 | Contig A    |
| B-F 5'-ATGCTGAATAAGAACACAGAGC-3'                                    |             |
| <b><i>Hooks for cloning of q-arm</i></b>                            |             |
| 5' hook (a 85 bp alphoid DNA sequence):                             |             |
| Sat-F 5'-CATTCTCAGAACTTCTTTGTGATGTGTGCATTCAACTCACAGAGTTGAACCTTCC-3' |             |
| Sat-R 5'-AAGAGTGTTCAAAAGCTCTATGAAAAGGAAGTTCAACTCTGTGAGTTGAAT-3'     |             |
| 3' hook (a 186 bp pBluescript sequence):                            |             |
| Prs-F 5'-ATGCGGATCCCTGGCAGACAGGTTTCCCGA-3'                          |             |
| Prs-R 5'-ATGCTCTAGACCGAGCTTGCCGTAATCATGG-3'                         |             |
| <b><i>DIAGNOSTIC PRIMERS FOR Q-ARM</i></b>                          |             |
| E-F2 5'-GAATCTATGCCACTTTTGCA-3'                                     | Contig D    |
| E-R2 5'-TGCCATTGTCAGTAAGTGAAG-3'                                    |             |
| D-F 5'-TTCATAGCAGCATGGATCAA-3'                                      | Contig C    |
| D-R 5'-CATCCAAAGGCTACTTTCCA-3'                                      |             |

|                    |                                                             |          |
|--------------------|-------------------------------------------------------------|----------|
| C-F<br>C-R         | 5'-TCTTTAGAGAGCAGGACTTGCT-3'<br>5'-TTGAATGACCACCTTTTCATC-3' | Contig B |
| hisD-F<br>hisD-R   | 5'-CGCTGATGAAATCCTCTATG-3'<br>5'-CTTCGGTTACAAAGGCGTT-3'     | HisD     |
| CMV/1-F<br>CMV/1-R | 5-GCGTTACATAACTTACGGTA-3'<br>5'-CGTAGATGTACTGCCAAGTAG-3'    | CMV      |
| CMV/2-F<br>CMV/2-R | 5'-GCGTTACATAACTTACGGTA-3'<br>5'-GTCATTAGTTCATAGCCCATA-3'   | CMV      |

---
