# Supplementary figures and images for: Refined human artificial chromosome vectors for gene therapy and animal transgenesis
Source: PubMed Central journal article supplement — Gene Ther. 2010 Nov 18;18(4):384–93. doi: 10.1038/gt.2010.147 (PMC3125098; doi:10.1038/gt.2010.147), 2010-11-18

# Supplementary Figure S1

a

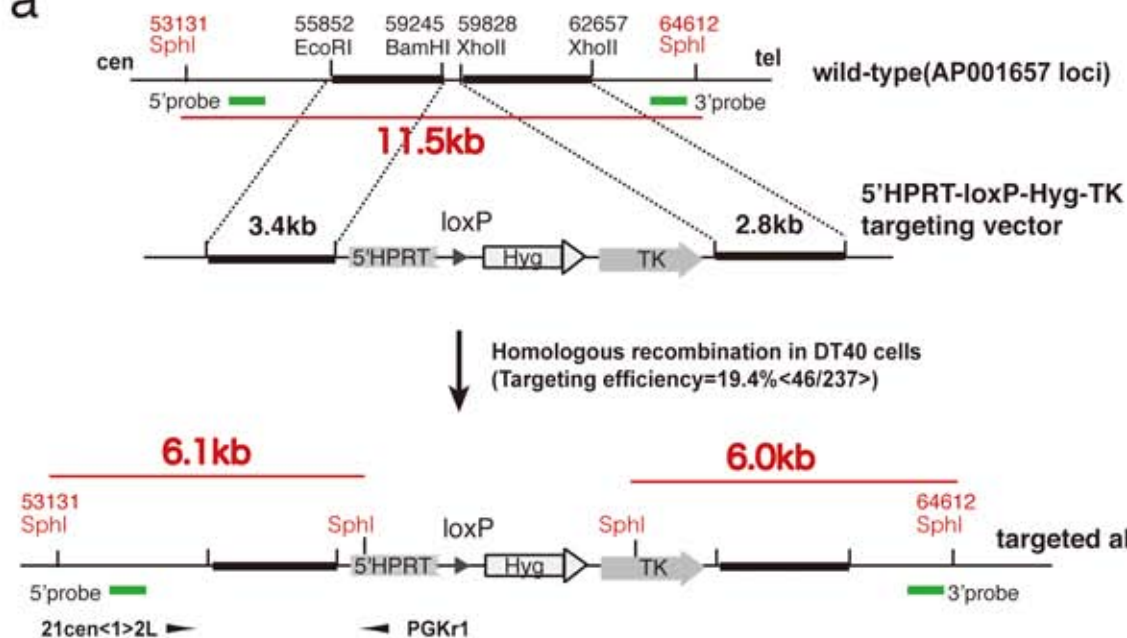

b

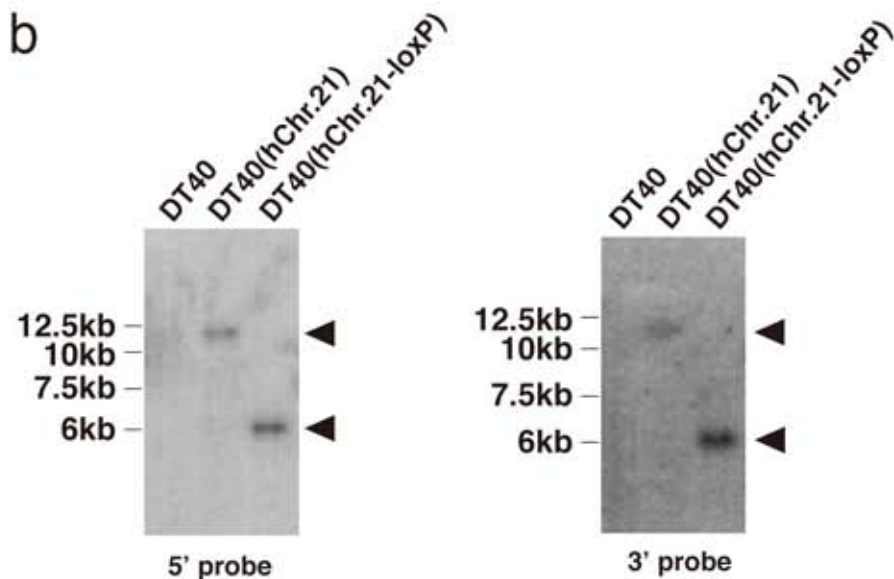

c

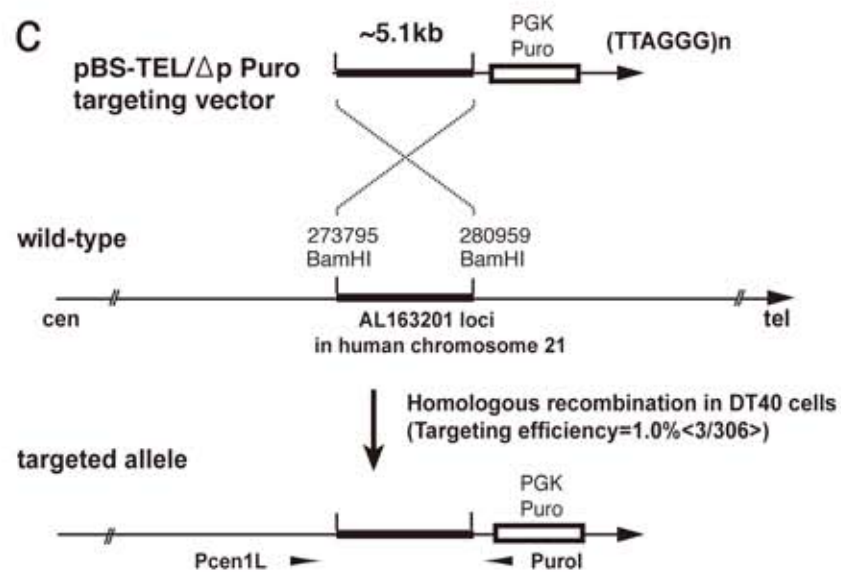

d

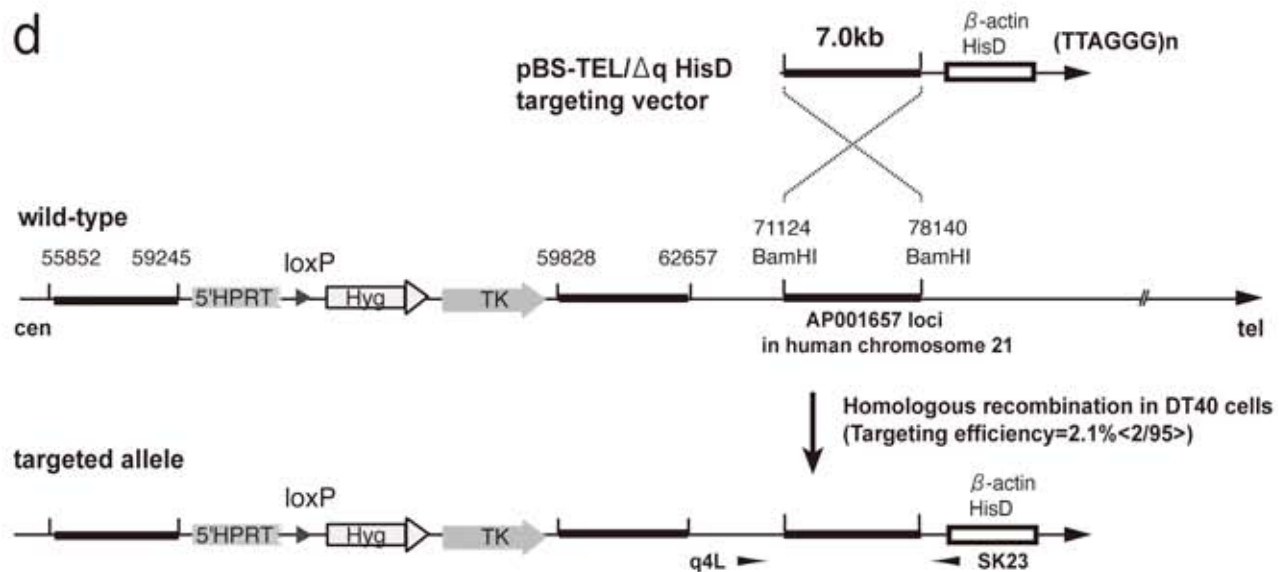

Supplement: gt2010147x1.pdf [file gt2010147x1.pdf]

# Supplementary Figure S2

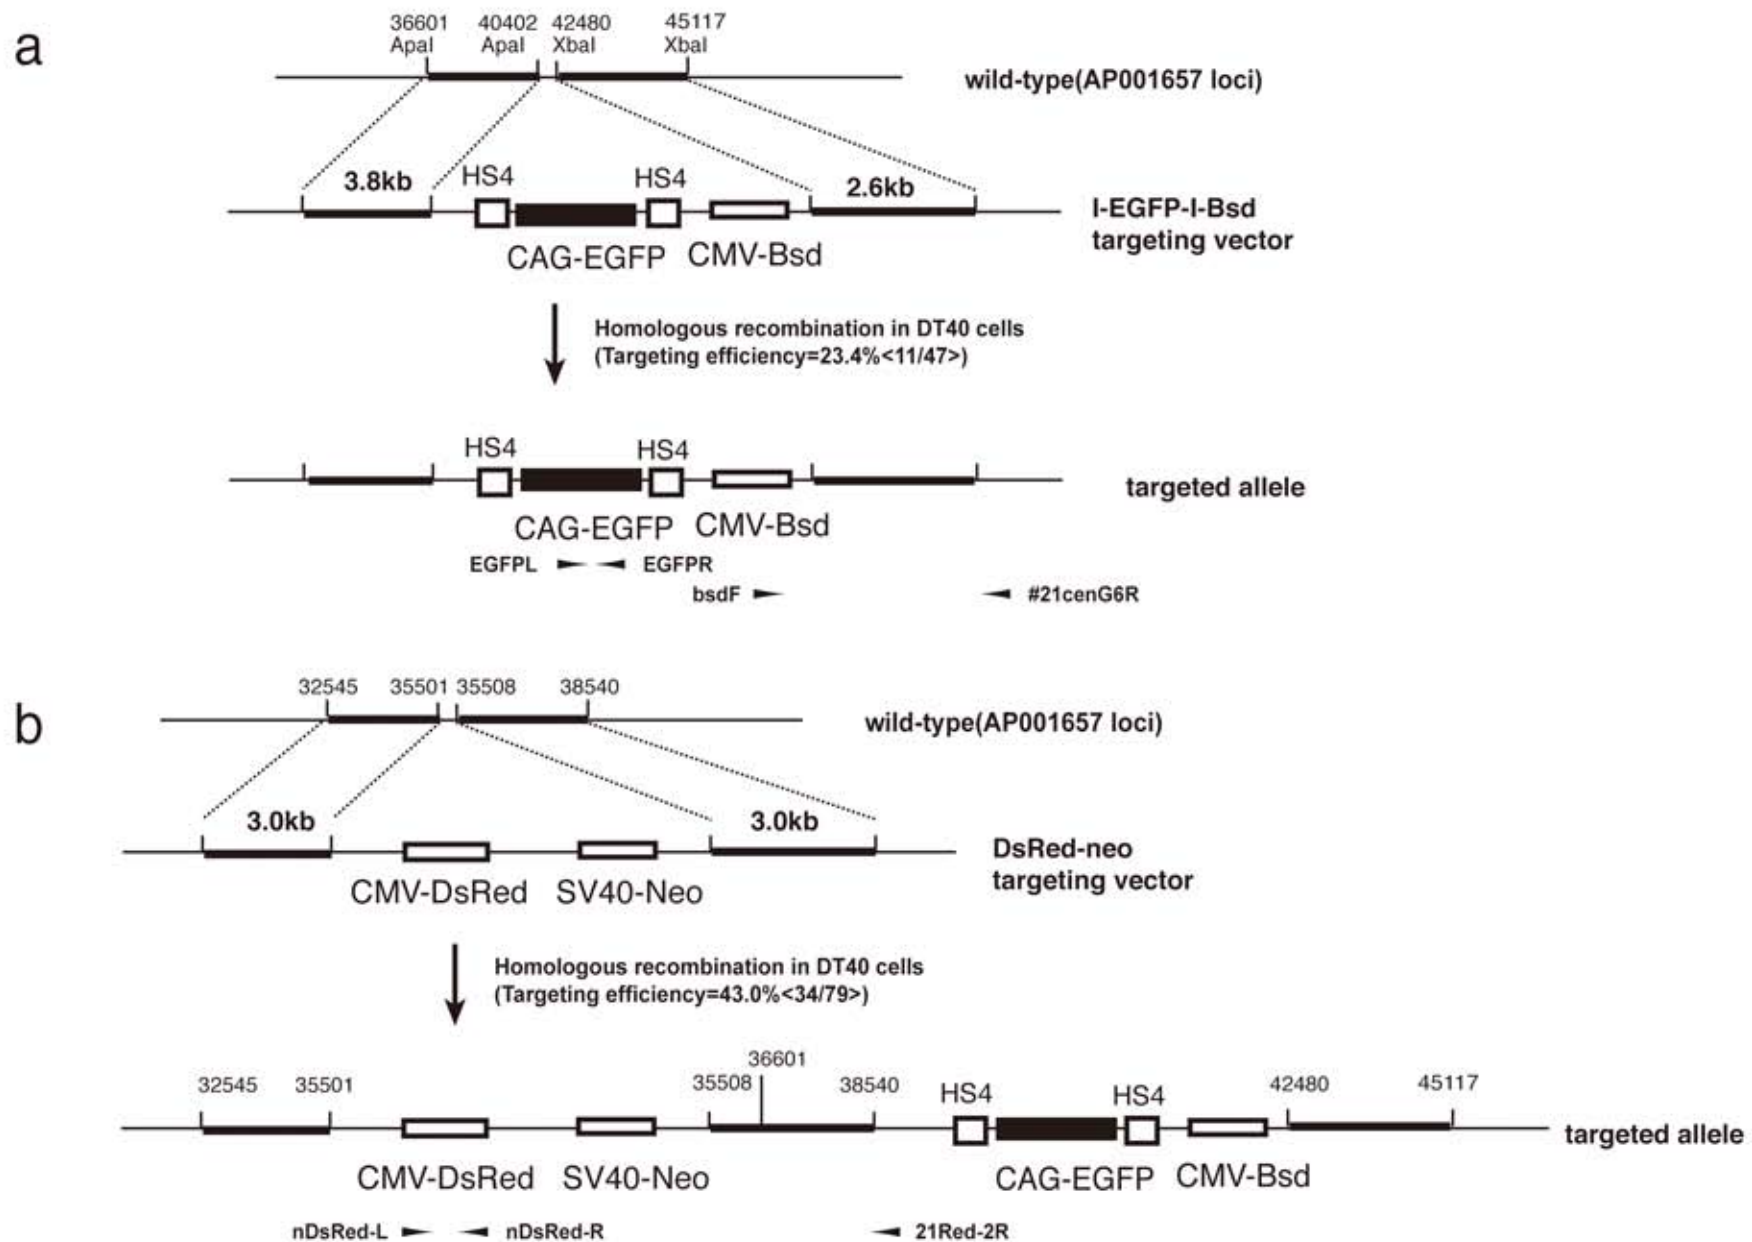

Supplement: gt2010147x2.pdf [file gt2010147x2.pdf]

# Supplementary Figure S3

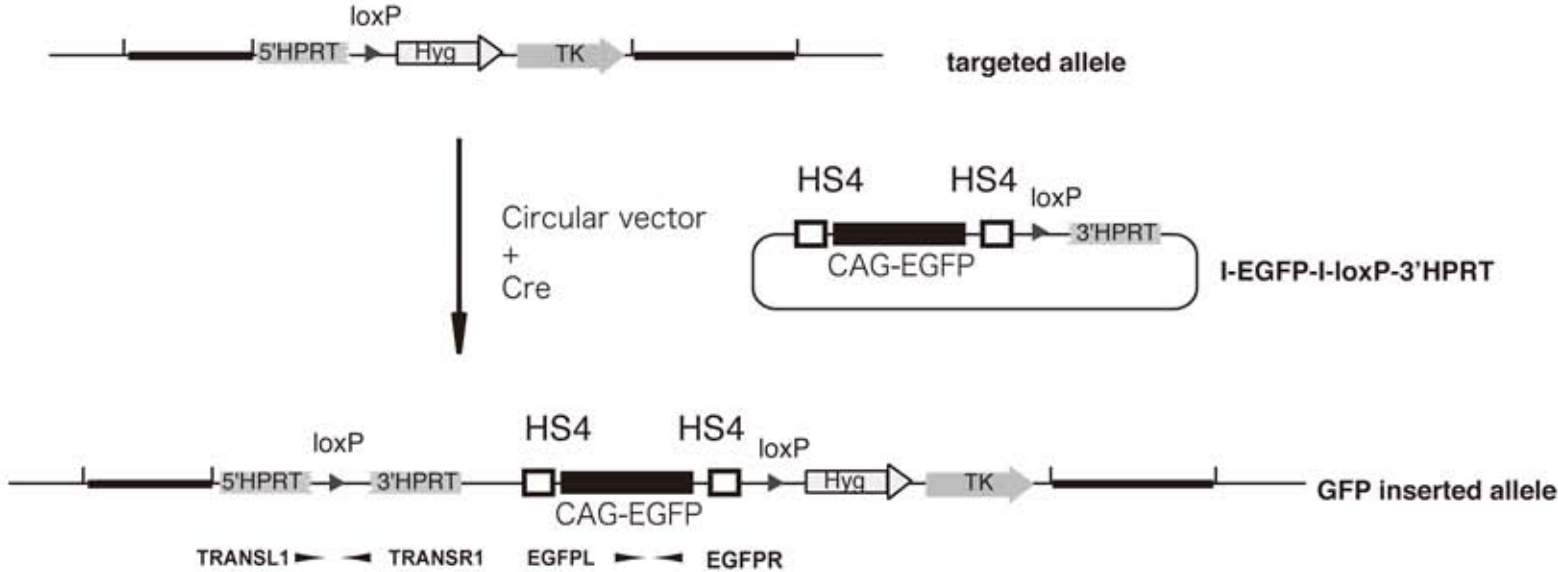

Supplement: gt2010147x3.pdf [file gt2010147x3.pdf]

# Supplementary Figure S5

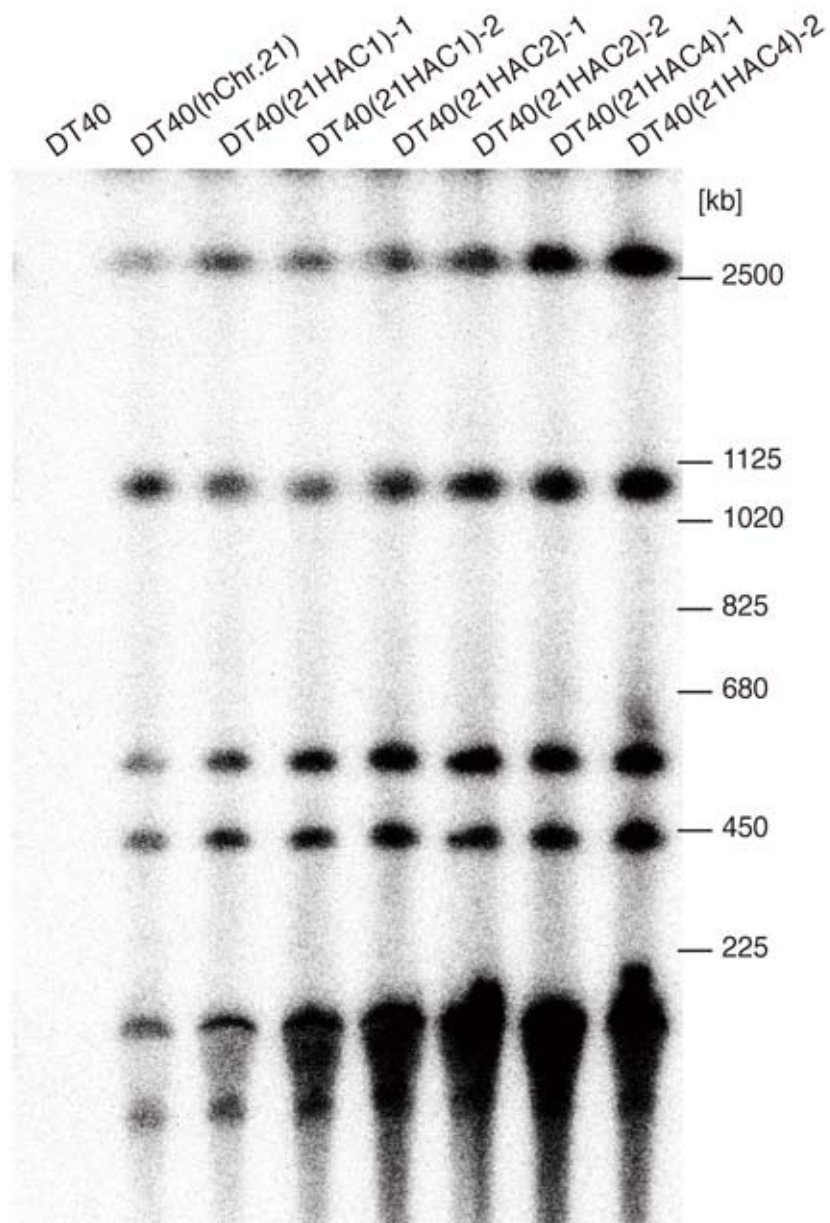

Supplement: gt2010147x5.pdf [file gt2010147x5.pdf]

# Supplementary Figure S6

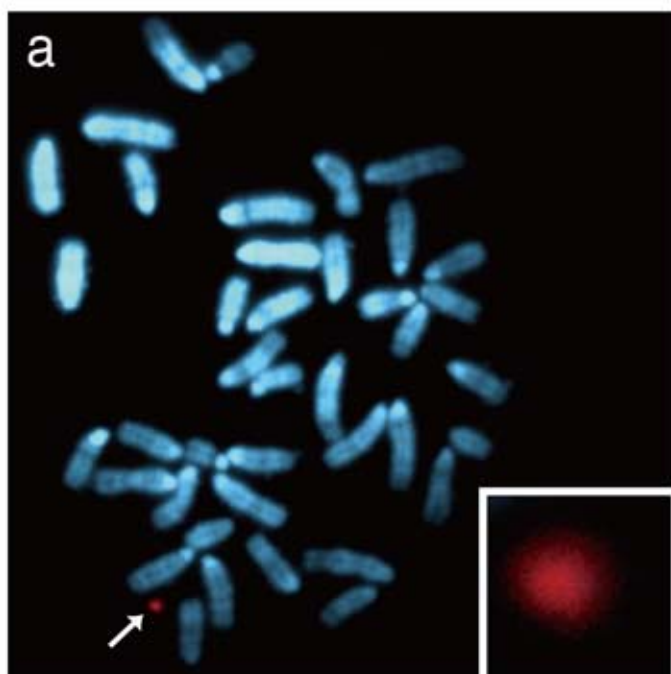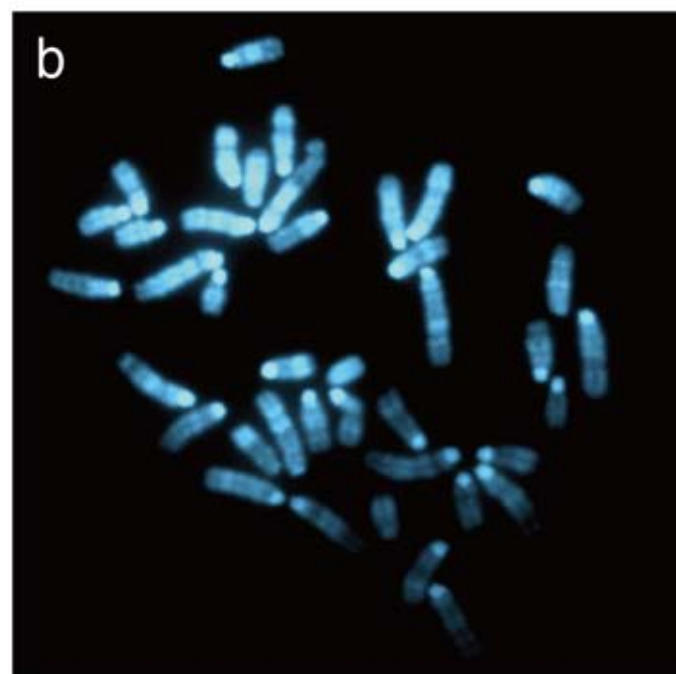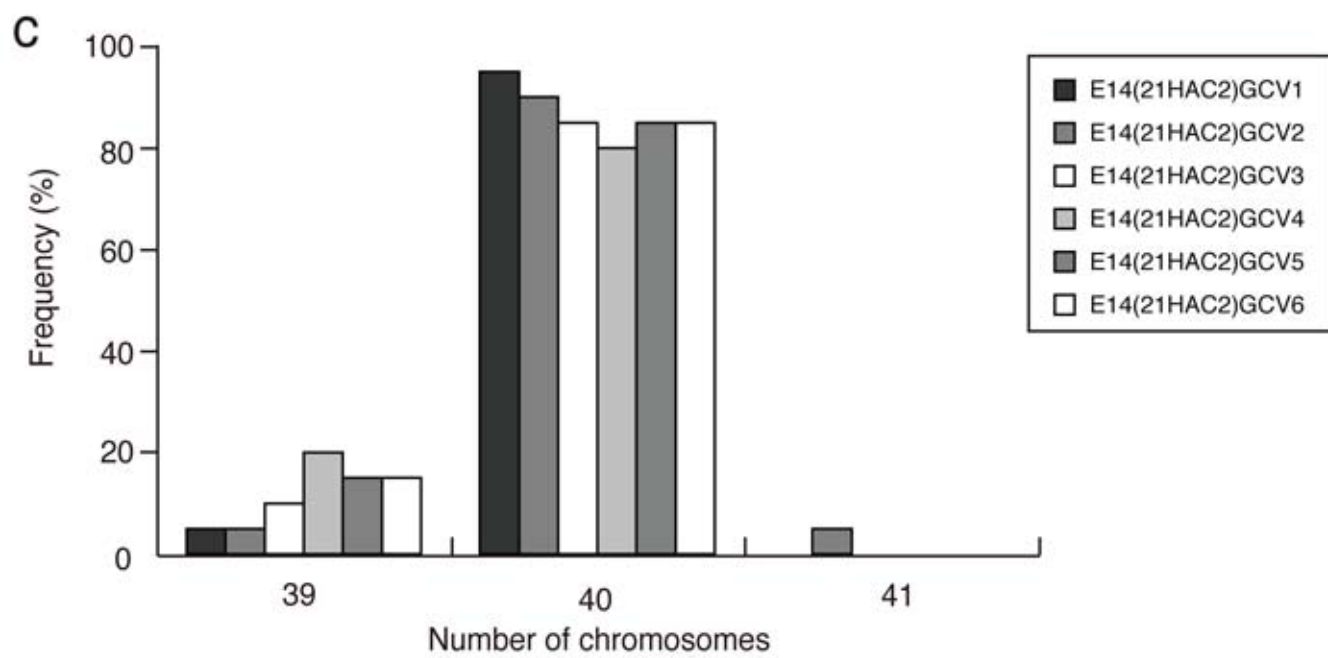

Supplement: gt2010147x6.pdf [file gt2010147x6.pdf]
